# Supplementary material for: Lessons from archaeology and heritage studies for the long-term preservation of records, knowledge and memory concerning deep geological disposal sites for nuclear waste
Source: Copernicus journal article supplement (doi:10.5194/sand-1-287-2021), 2021-11-10
Supplement: Supplementary file 1 [file sand-1-287-2021-supplement.zip]

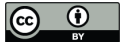

## *Supplement of*

# **Lessons from archaeology and heritage studies for the long-term preservation of records, knowledge and memory concerning deep geological disposal sites for nuclear waste**

**Cornelius Holtorf and Anders Högberg**

*Correspondence to:* Cornelius Holtorf ([cornelius.holtorf@lnu.se](mailto:cornelius.holtorf@lnu.se)) and Anders Högberg ([anders.hogberg@lnu.se](mailto:anders.hogberg@lnu.se))

- sand-1-287-2021-supplement-title-page.pdf
- 04\_Holtorf SESSION\_4E\_(sand-2021-19) .pvl

The copyright of individual parts of the supplement might differ from the article licence.
